# Supplementary material
Source: Springer Nature journal article supplement (https://www.springermedizin.de/resource/supplementary/13223_2013_504_MOESM3_ESM.pdf/9596666)

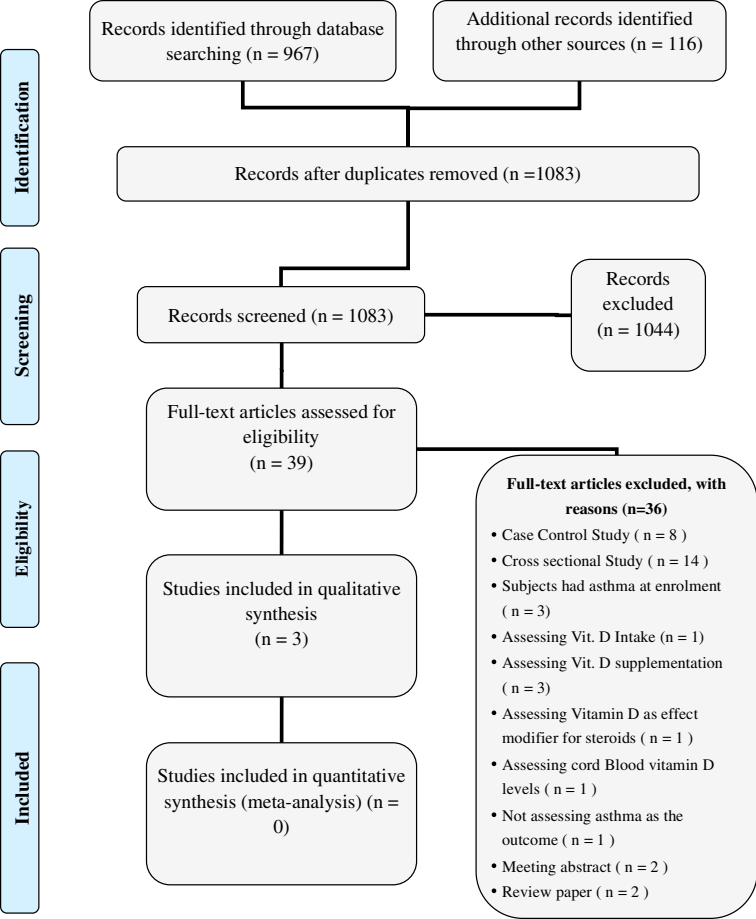

Supplement: MOESM3 [file 9596666]
